# Supplementary material for: STAT4 is expressed in neutrophils and promotes antimicrobial immunity
Source: JCI journal article supplement (doi:10.1172/jci.insight.141326), 2021-06-17
Supplement: sd1 [file 1]

## Supplemental Materials

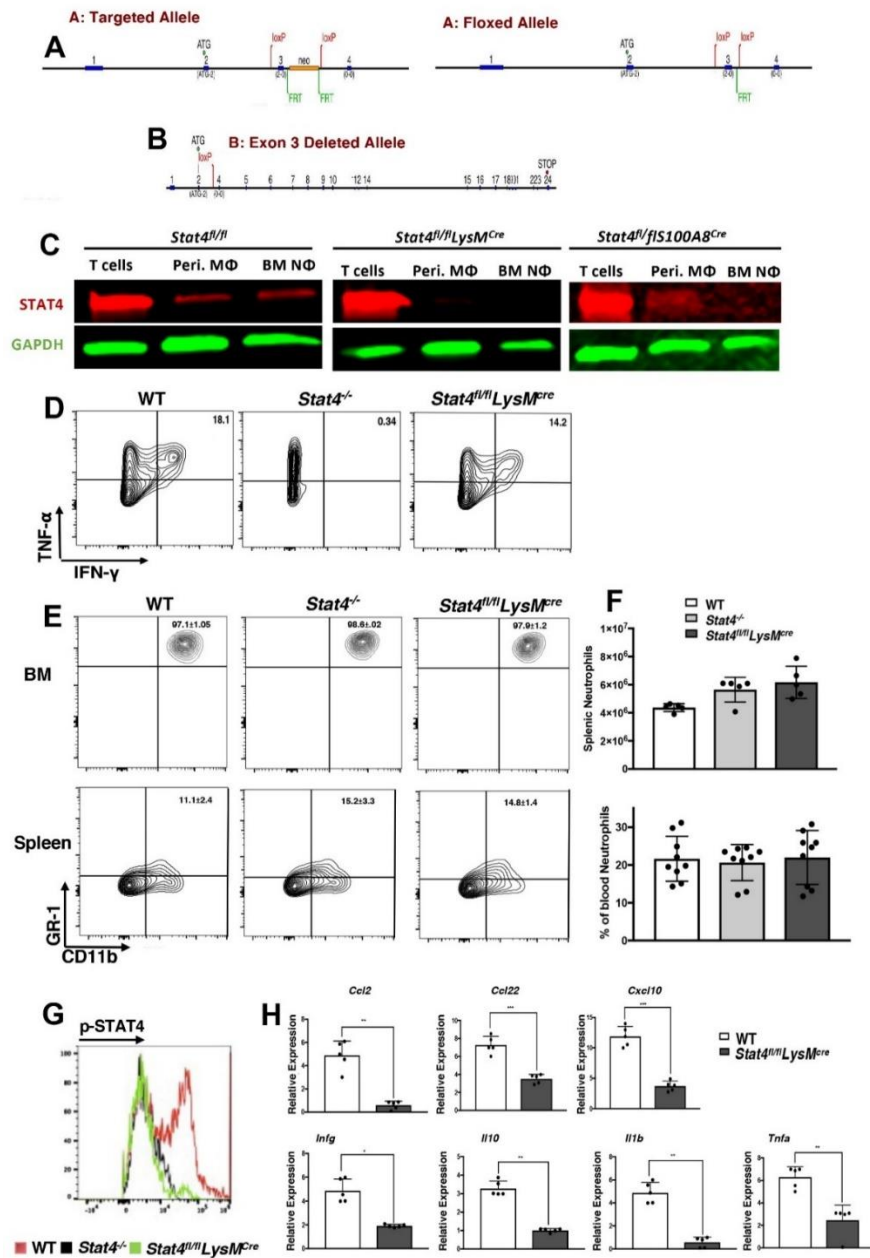

**Supplemental Figure 1**

**Supplemental Figure 1: Development of *Stat4<sup>fl/fl</sup>LysM<sup>Cre</sup>* and *Stat4<sup>fl/fl</sup>S100A8<sup>Cre</sup>* mice. (A) Schematic map of the *Stat4* locus showing the inserted loxP sites flanking the third exon and the FRT-flanked neo cassette before (top) and after (bottom) Flp-mediated deletion. (B) Schematic of the targeted *Stat4* locus following Cre-mediated deletion. The third exon was chosen for targeting because removal causes a nonsense frameshift following splicing of the remaining exons. (C) STAT4 expression in T cells, peritoneal macrophages, and BM neutrophils isolated from WT, *Stat4<sup>fl/fl</sup>LysM<sup>Cre</sup>*, and *Stat4<sup>fl/fl</sup>S100A8<sup>Cre</sup>* mice. (D) Naïve CD4 T cells from WT, *Stat4<sup>-/-</sup>*, and *Stat4<sup>fl/fl</sup>LysM<sup>Cre</sup>* mice were differentiated under Th1 conditions for 5 days, then activated with PMA/ionomycin for 6 hours, and stained with intracellular cytokine Abs. (E) Representative FACS plots for CD11b<sup>+</sup>Gr-1<sup>+</sup> neutrophils in the BM and the spleen of WT, *Stat4<sup>-/-</sup>*, and *Stat4<sup>fl/fl</sup>LysM<sup>Cre</sup>* mice. (F) Number of neutrophils in the spleen and peritoneal blood of WT, *Stat4<sup>-/-</sup>*, and *Stat4<sup>fl/fl</sup>LysM<sup>Cre</sup>* mice. (G-H) Bone marrow derived macrophages (BMDM) from WT, *Stat4<sup>-/-</sup>*, and *Stat4<sup>fl/fl</sup>LysM<sup>Cre</sup>* mice were activated with HK-MRSA and IL-12. (G) Representative FACS plot for pSTAT4. (H) Cytokine and chemokine levels by qPCR. Data are average±SEM. \* p<0.05, \*\*p<0.01.**

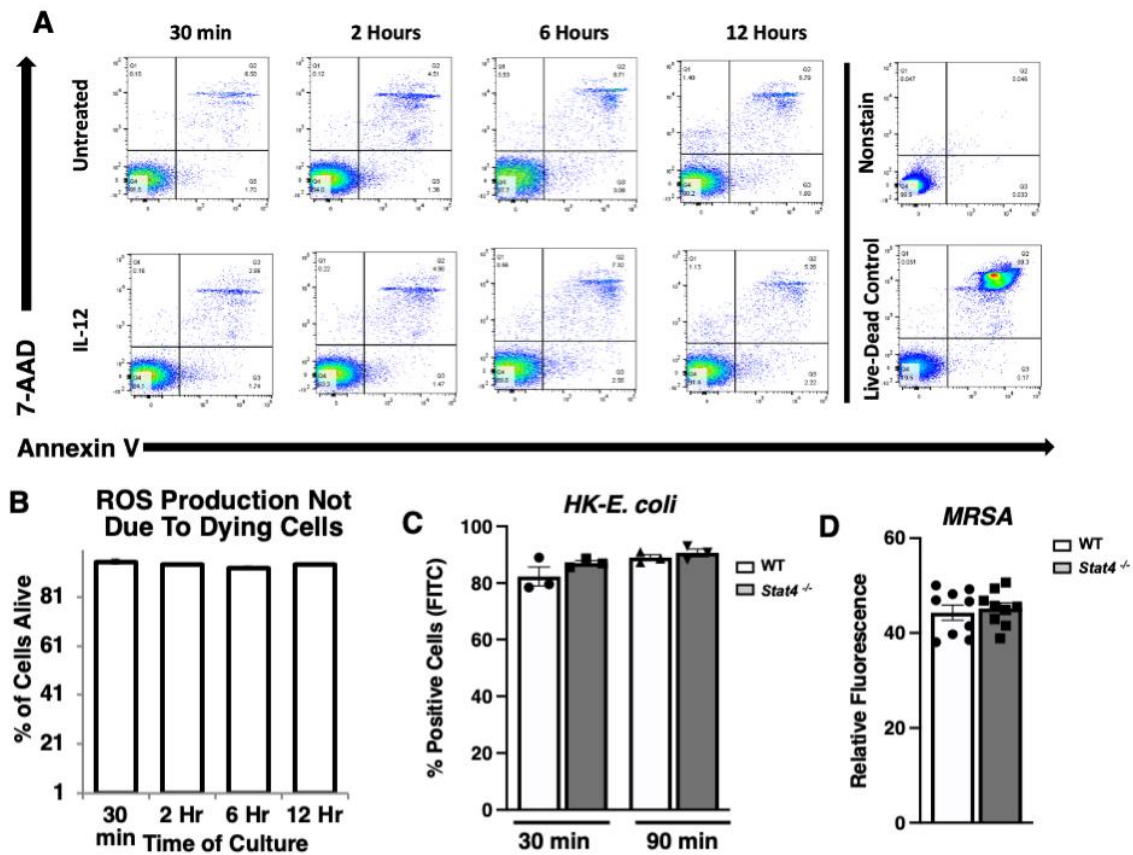

**Supplemental Figure 2. STAT4-deficiency has no impact on neutrophil apoptosis and phagocytosis. (A-B)** Neutrophils were incubated with or without IL12 (40 ng/ml) in complete RPMI media. After different time points (0.5-12 hrs), neutrophils were collected, stained with Annexin V and 7-AAD, and analyzed by FACS (n=2/per group). Representative FACS plot and averages for live cells are shown. **(C-D)** WT and *Stat4*<sup>-/-</sup> bone marrow neutrophils were incubated with fluorescein-labeled K-12 *E. coli* or *MRSA*. After 30 and 90 min, neutrophils were collected, washed, non-phagocytosed bioparticles were quenched with trypan blue, and fluorescein positive cells were detected using FACS. Data are average±SEM.
